# Supplementary material for: Alteration of plasma metabolites associated with chemoradiosensitivity in esophageal squamous cell carcinoma via untargeted metabolomics approach
Source: PubMed Central journal article supplement (PMC7466788; doi:10.1186/s12885-020-07336-9), 2020-09-02
Supplement: 12885_2020_7336_MOESM2_ESM.pdf [file 12885_2020_7336_MOESM2_ESM.pdf]

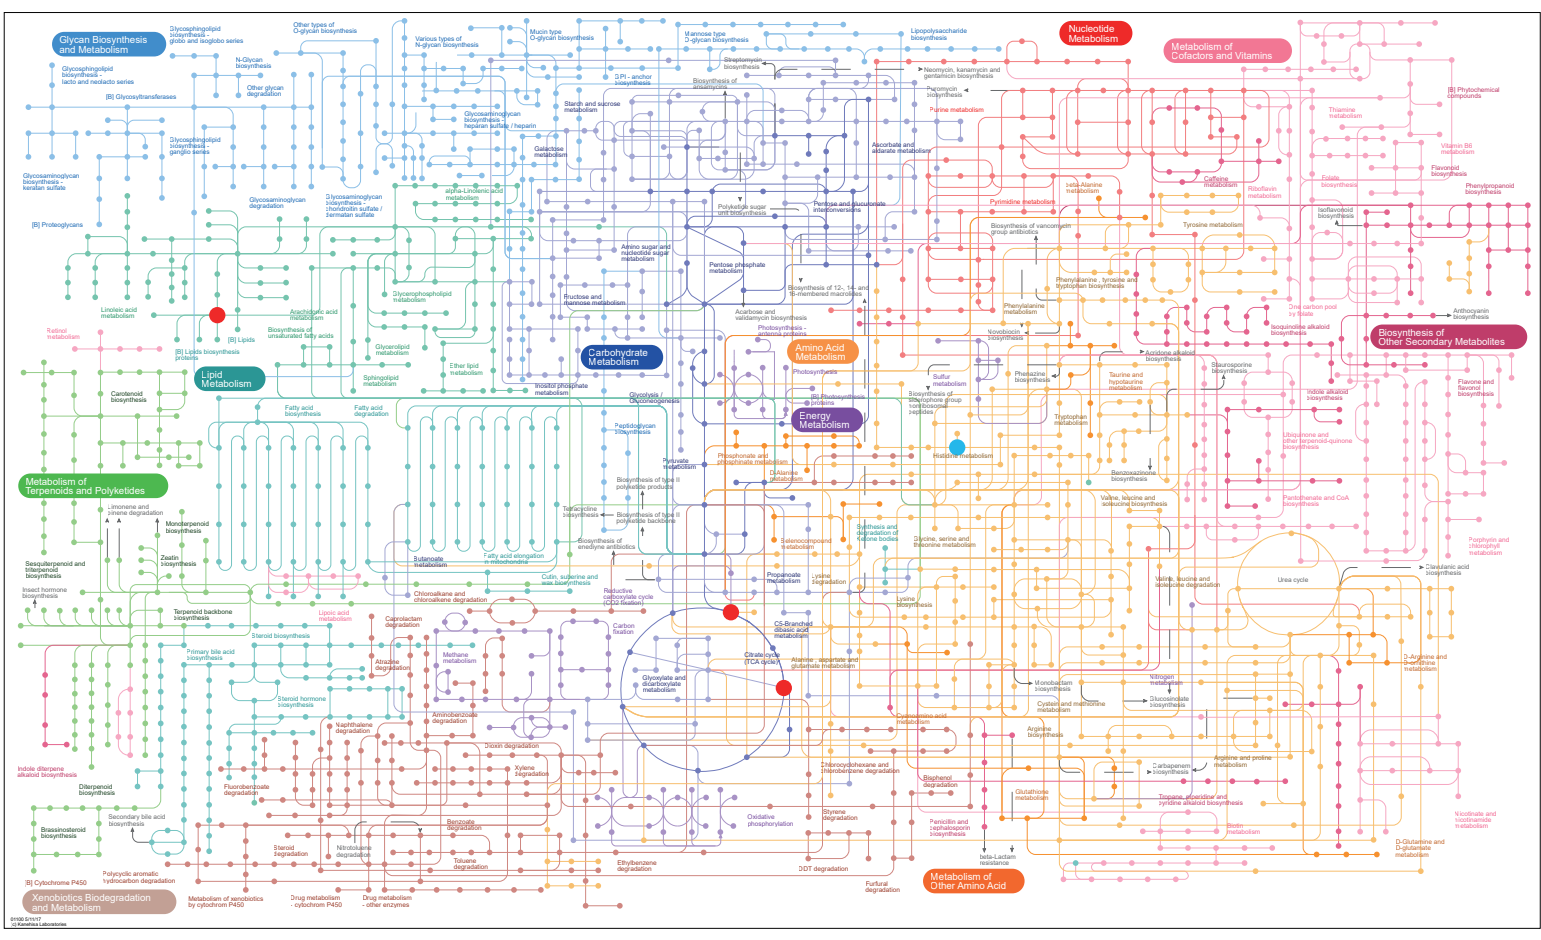

Source: <https://www.ncbi.nlm.nih.gov/pmc/articles/PMC4021111/>
